1 **Lipid droplet phase transition in freezing cat embryos**  
2 **and oocytes probed by Raman spectroscopy**

3

4 Okotrub K.A.<sup>1,\*</sup>, Mokrousova V.I.<sup>2,3</sup>, Amstislavsky S.Y.<sup>2</sup>, Surovtsev N.V.<sup>1,3</sup>

5

6  
7

8

9

10

11

12

13

14

15 **Keywords:**

16 Raman spectroscopy; cryopreservation; embryo; oocyte; lipid droplet; lipid phase transition; freezing  
17 cell; triglyceride

18

19 **Short title: LPT in freezing cat embryos and oocytes**

20

21

22

23

## 24 **ABSTRACT**

25       Embryo and oocyte cryopreservation is a widely used technology for cryopreservation of genetic  
26 resources. One challenging limitation of this technology is the cell damage during freezing associated  
27 with the intracellular lipid droplets. We exploit a Raman spectroscopy to investigate the freezing of  
28 cumulus-oocyte complexes, mature oocytes and early embryos of a domestic cat. All these cells are  
29 rich in lipids. The degree of lipid unsaturation, lipid phase transition from liquid-like disordered to  
30 solid-like ordered state (main transition) and triglyceride polymorphic state are studied. For all cells  
31 examined, the average degree of lipid unsaturation is estimated about 1.3 (with  $\pm 20$  % deviation)  
32 double bonds per acyl chain. The onset of the main lipid phase transition occurs in a temperature range  
33 from  $-10$  to  $+4$  °C and does not depend significantly on the cell type. It is found that lipid droplets in  
34 cumulus-oocyte complexes undergo an abrupt lipid crystallization, which not completely correlate  
35 with the ordering of lipid molecule acyl chains. In the case of mature oocytes and early embryos  
36 obtained *in vitro* from cumulus-oocyte complexes, the lipid phase transition is broadened. In frozen  
37 state lipid droplets inside the cumulus-oocyte complexes have higher content of triglyceride  
38 polymorphic  $\beta$  and  $\beta'$  phases ( $\sim 66\%$ ) than it is estimated for the mature oocytes and the early embryos  
39 ( $\sim 50\%$ ). For the first time, to our knowledge, temperature evolution of lipid droplets phase state is  
40 examined. Raman spectroscopy is proved as a prospective tool for *in situ* monitoring of lipid phase  
41 state in single embryo/oocyte during freezing.

42

## 43 INTRODUCTION

44 Cryopreservation of preimplantation embryos and gametes is an important tool, routinely used to  
45 back up and exchange laboratory animal strains (1,2) and farm animal breeds (3,4). More recently,  
46 some successful examples to apply these technologies and Genome Resource Bank (GRB) concept for  
47 endangered animal species were reported (5-7). Despite significant progress in the development of  
48 cryopreservation approaches over the last few decades, these approaches can be effectively applied to  
49 the relatively small number of mammalian species (8,9). To expand the applicability of GRB concept  
50 for mammalian species preservation, further investigations of the factors affecting the cell survival  
51 through the procedures of freezing/cryopreservation are needed.

52 Change of lipid phase state in cells during freezing is among the most important factors limiting  
53 the cryopreservation of embryos and oocytes. A number of mammalian species are challenging for  
54 embryos/oocytes cryopreservation due to the excessive lipid droplet (LD) content (10-12). The  
55 problem of high lipid content in oocytes and embryos seems to concern virtually all the representatives  
56 of the *Carnivora* order (5,12), among which a large proportion are endangered species. At least, 28 of  
57 38 extant species of *Felidae* family are either already considered as endangered/vulnerable or will get  
58 this status in the nearest future. Embryo cryopreservation was successfully applied to about five felid  
59 species (13). However, cryopreservation of oocytes is a big challenge even for the domestic cat (5,14).  
60 Modern approaches developed to pass over the lipid caused limitations are based on preliminary  
61 remove of LDs from the cell (“delipidation” or “delipation”) (15) or lipid redistribution inside of the  
62 cell (so-called “polarization”) (16). Delipidation procedure might be performed mechanically using  
63 micromanipulators with a miniature suction pipette (15) or by addition of lipolytic chemicals (17,18).  
64 In some cases, these methods help to increase cryotolerance and make possible successful freezing and  
65 thawing of the treated samples. For example, pig preimplantation embryo cryopreservation became  
66 possible after the introduction of delipidation procedure before freezing (15,19). Domestic cat oocytes  
67 were successfully cryopreserved after polarization procedure (16). However, some studies evidence  
68 that using delipidation to modulate the lipid content of oocytes, may compromise further embryo  
69 development after thawing (16,20).

70 Development of alternative approaches to increase cryotolerance of the oocytes/embryos with  
71 high lipid content needs knowledge about lipid phase states in the freezing samples and about  
72 mechanisms of lipid caused cryoinjury. At physiological conditions, lipid state in cells corresponds to  
73 liquid-like disordered phase (21). Disordered phase provides a fast diffusion of lipids, lipophilic  
74 admixtures in the lateral direction (21,22) and a high permeability of water and water-soluble  
75 molecules across phospholipid membranes (23,24), that is essential for cell signalling and transport

76 functions. Membrane proteins are also believed to be sensitive to lipid environment and lipid phase  
77 state (21).

78 Freezing membranes and LDs undergo a lipid phase transition (LPT) into solid-like ordered  
79 phases (25,26). Triglycerides contained in the LDs can exist in several polymorphic solid-like states  
80 with different phase stability and melting temperatures (26-28). Two different order parameters can be  
81 used to characterize the lipid state during freezing. The first one is the degree of acyl chain ordering  
82 which can be referred to the number of gauche conformations in the hydrocarbon chain (29). The  
83 second order parameter is needed to characterize the crystallization process and related to the  
84 translational order in lipid molecules arrangement. In the case of lipid mixtures, these two parameters  
85 might change independently, and intermediate phase states, such as liquid ordered state, become  
86 possible. In the liquid ordered state, the lipid acyl chains are in an ordered conformational state, but the  
87 molecules are arranged randomly, as in a liquid state (30,31). Biological lipid structures consist of  
88 multicomponent lipid mixtures. As a result, the description of the phase transition becomes  
89 complicated. The simultaneous coexistence of the several phases can be observed (32), and phase  
90 transition may occur via intermediate states (33).

91 Lipid related cryoinjury can arise from the LPT itself or failures in cell regulation caused by  
92 ordered lipid state. The LPT is believed to occur at relatively high temperatures and can be responsible  
93 for injuries of embryos and oocytes at so-called “chilling” temperatures (about 0 ÷ 10 °C) (34-37). The  
94 efficiency of polarization and delipidation procedures drops a hint that cryoinjury arises not from LDs  
95 degradation itself but from other cell components somehow related to LDs. Besides energy storing,  
96 LDs are known to participate in the regulation of oxidative stress and protein handling (38). At the  
97 LPT temperatures, LDs may release of compounds in cell cytoplasm leading to toxic effects or a  
98 disturbance in cell regulation mechanisms. Another hypothesis of damaging effect considers the LPT  
99 induced phase separation and redistribution of different lipophilic compounds inside of freezing LDs  
100 and membranes (39). In the case of triglycerides, the formation of different polymorphic forms can  
101 lead to triglyceride separation in LDs.

102 Nowadays, the mechanisms of cryoinjuries induced by lipids remain obscure, not least because  
103 of deficiency of experimental data on lipid state in freezing cells. Electron microscopy observations  
104 indicate phase separation in LDs inside of frozen oocytes (40). Arav et al. applied infrared (IR)  
105 spectroscopy to investigate temperatures of the LPT in bovine, ovine and human oocytes (34-36). It  
106 was found that the LPT for these mammalian species occurs at temperatures above 0 °C and depends  
107 on the composition of LDs. Cells with a phase transition at low temperatures are supposed to have a  
108 higher tolerance to chilling.

109 Raman spectroscopy is a prospective approach for contactless *in situ* study of freezing cells with  
110 high spatial resolution. In the last decade, this approach was applied to investigate the distribution of

111 ice, cryoprotectant and eutectic crystallisation products in freezing samples (41-44). Moreover,  
112 resonance Raman spectroscopy revealed changes of cytochrome redox state in freezing cells (45). The  
113 capability of Raman spectroscopy to investigate lipid phase state is proven by studies of frozen cells  
114 (2,46) and model lipid systems (47,48).

115 The present study aimed to identify phase states and transitions occurring in LDs of domestic cat  
116 embryos and oocytes during freezing. We investigated stretching CH, C=O, CC Raman bands in the  
117 spectra measured from LDs in a wide temperature range to extract the degree of lipid unsaturation, the  
118 LPT parameters and polymorphic phase content in a frozen state. A question whether different cell  
119 types undergo the LPT in a similar way or not is considered.

## 120 MATERIALS AND METHODS

### 121 Sample preparation

122 Ovaries and epididymises from domestic cats were obtained after routine ovariohysterectomy  
123 and orchiectomy from local veterinary clinics, and were transported to the laboratory within 3–4 h at  
124 +4 °C in HEPES buffered TCM-199 (Thermo Fisher Scientific, MA) supplemented with streptomycin  
125 (100 µg/ml) and penicillin (100 IU/ml).

126 The ovaries were minced and cumulus-oocyte complexes (COC) collected into TCM-199  
127 (Thermo Fisher Scientific, MA), supplemented with 5.67 mM HEPES, 25 mM NaHCO<sub>3</sub>, 2.2 mM  
128 pyruvate, 2.2 mM sodium lactate, 100 µg/ml streptomycin, 100 IU/ml penicillin and 3 mg/ml bovine  
129 serum albumin at 38 °C. Oocytes with uniformly dark ooplasm surrounded by several layers of  
130 cumulus cells were rinsed three times in HEPES buffered TCM-199 and cultured in 50 µl of TCM-199  
131 (Thermo Fisher Scientific, MA), containing 5 IU/ml human chorionic gonadotropin (hCG) (Chorulon,  
132 Intervet International B.V., the Netherlands), 1 IU/ml equine chorionic gonadotropin (eCG) (Follimag,  
133 Mosagrogen, Russia), and supplemented with 2.2 mM sodium lactate, 2.2 mM pyruvate, 25 mM  
134 NaHCO<sub>3</sub>, 100 µg/ml streptomycin, 100 IU/ml penicillin and 3 mg/ml BSA under mineral oil at 38 °C,  
135 v/v 5 % CO<sub>2</sub> in 24 hours until the metaphase II stage is reached (*in vitro* maturation, IVM).

136 For *in vitro* fertilization (IVF), MII oocytes were rinsed three times in Ham's F-10 (Sigma  
137 Aldrich, MO) supplemented with 5 v/v % fetal calf serum, 1 mM L-glutamine, 10 µg/ml heparin, 100  
138 µg/ml streptomycin and 100 IU/ml penicillin and then co-incubated with 10<sup>6</sup> motile epididimal  
139 spermatozoa/ml in 50 µl droplets of IVF-medium under mineral oil in 5 v/v % CO<sub>2</sub> at 38°C.

140 Embryos were cultured in Ham's F-10 (Sigma Aldrich, MO) supplemented with 5 v/v % fetal  
141 calf serum, 1 mM L-glutamine, 100 µg/ml streptomycin and 100 IU/ml penicillin at 38 °C, 5 v/v %  
142 CO<sub>2</sub> under oil for up to two days, when the 2-4-cell stage is reached.

143 To provide Raman study from one to three cells (COCs, mature oocytes or embryos) were  
144 transported in plastic straws filled with Ham's F-10 solution. Before freezing, oocytes/embryos were

145 transferred to cryoprotectant solution of Dulbecco's Phosphate Buffer Saline (DPBS) and 10 v/v %  
146 glycerol. Equilibration with cryoprotectant solution was performed in several steps: on the first step  
147 oocytes/embryos were transferred into three times diluted DPBS/glycerol solution for 5 min; then  
148 specimen was put into the 10  $\mu$ l drop of two times diluted DPBS/glycerol solution. Finally, the cells  
149 were transported into the undiluted DPBS/glycerol solution and placed on the glass with a cavity. The  
150 sample was covered with a piece of mica slice and sealed with paraffin.

## 151 **Sample freezing**

152 We carried out experiments with COCs and mature oocytes (three experiments per group) and  
153 four experiments with preimplantation embryos (see photos in Fig. 1 a-d). Samples with cells were  
154 placed in FTIR600 cryostat (Linkam, UK) cooled by liquid nitrogen vapour flow. Freezing protocol  
155 was chosen close to standard slow program freezing protocol conventionally used for mammalian  
156 embryos (2,49,50). The sample was cooled to ice nucleation temperature  $T_n = -7$  °C at cooling rate 1  
157 °C/min. Ice nucleation was induced by touching the sample with copper wire precooled in liquid  
158 nitrogen. After ice formation, the sample was kept at  $T_n$  from 10 to 30 min to provide ice  
159 recrystallization. The sample was cooled to  $-40$  °C with cooling rate 0.3 °C/min, then at the rate of  
160  $1 \div 2$  °C/min to  $-70$  °C and after that with the rate of  $5 \div 10$  °C/min to  $-180$  °C. Sample cooling was  
161 paused at specified temperatures to acquire Raman spectra. Local temperature near the freezing cell  
162 was verified by Raman spectrum of ice (see Fig S1 in Supplementary Material).

## 163 **Raman experiment**

164 Raman measurements were carried out using a laboratory-built experimental setup (45). Solid-  
165 state laser (Millennia II, Spectra Physics) at a wavelength of 532.1 nm was used for Raman scattering  
166 excitation. A 100 $\times$  objective (PL Fluotar L; Leica Microsystems, Germany) with NA=0.75 and  
167 working distance 4.6 mm was used to focus laser radiation in approximately 1  $\mu$ m diameter spot.  
168 Irradiation power after objective was 6.5 mW. Scattered radiation was collected using the same  
169 objective, and Raman spectra were measured using a monochromator (SP2500i; Princeton  
170 Instruments, NJ) equipped with a CCD detector (Spec-10:256E/LN; Princeton Instruments, NJ).  
171 Wavelengths for all measured spectra were calibrated using a neon-discharge lamp.

172 We measured Raman spectra from several substances with known numbers of double bonds.  
173 Palmitoleic, linoleic, and linolenic acids, triolein, trillinolein were taken from Sigma Aldrich.  
174 Lyophilized phospholipids 1,2-dioleoyl-sn-glycero-3-phosphocholine (DOPC) and 1,2-dilinoleoyl-sn-  
175 glycero-3-phosphocholine (DLPC) were taken from Avanti Polar Lipids. Raman spectra were  
176 measured from fatty acids and triglycerides in liquid phase state. To measure Raman spectra from  
177 phospholipids in liquid-like disordered phase, the suspensions of multilamellar lipid vesicles were  
178 prepared using the protocol described previously (48).

179 The high spatial resolution allows collecting Raman scattering from single LD in the freezing  
180 oocyte or the embryo cell (Fig. 1 e). We aimed to measure Raman spectra from the same LD during  
181 the experiment. However, it was not always possible due to LD movements and hiding during cell  
182 freezing. Thus, we were compelled to change the followed LD one or two times per experiment.  
183 Nevertheless, Raman spectra were collected from the neighbouring LDs from the same area inside of  
184 the cell. For each experimental point, two spectral ranges were sequentially measured to provide the  
185 overall spectral range from 300 to 4000  $\text{cm}^{-1}$ . For both spectral ranges, several spectra were acquired  
186 at each experimental position, followed by spectral averaging. Acquisition time for a single spectrum  
187 was 1 min and overall measurement time for one experimental point was 15÷20 min.

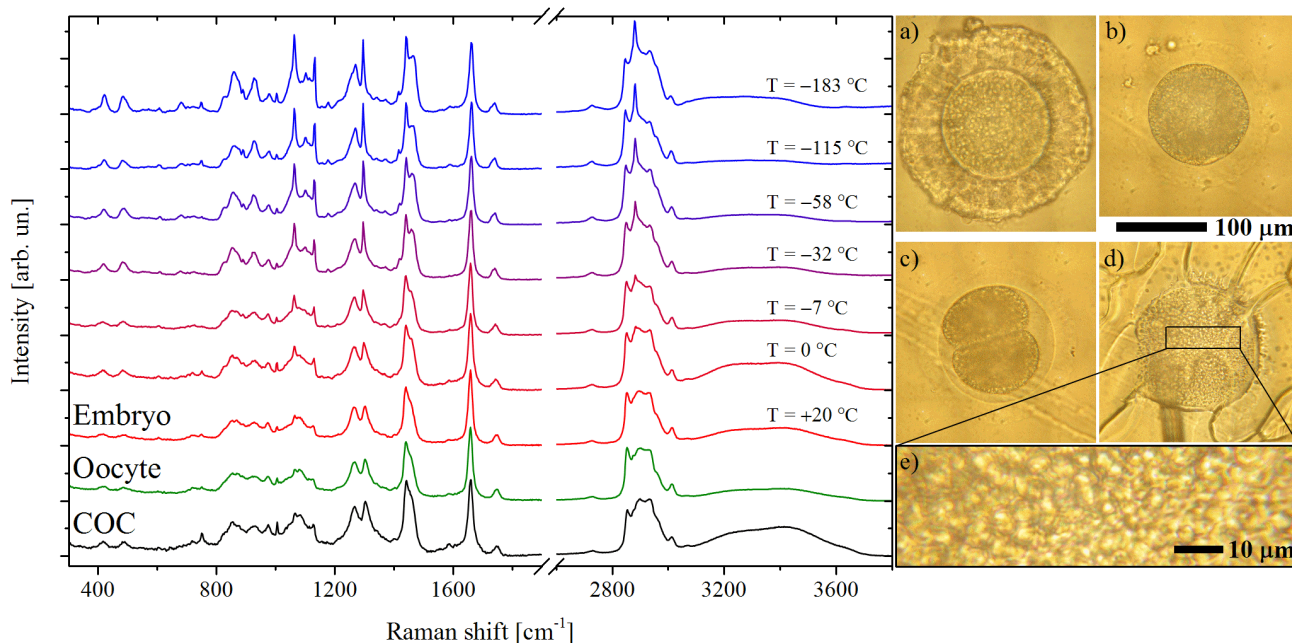

188  
189 **FIGURE 1** On the left side, representative raw Raman spectra from LDs. Spectra are  
190 shifted vertically for illustrative purposes. Order of spectra (bottom to top): COC at  
191 +20 °C, mature oocyte at +20 °C, early embryo at +20, 0, -7, -32, -58, -115, -183  
192 °C. Brightfield microscopy photos (on the right side) for a) COC at +20 °C, b)  
193 mature oocyte at +20 °C, c,d) embryo at +20, -50 °C, (e) a magnified region with the  
194 high amount of LDs.

## 195 RESULTS

196 Embryos and oocytes of the domestic cat are rich with lipids, which are mainly found in LDs.  
197 Fig. 1 shows representative Raman spectra from LDs in COC, *in vitro* matured oocyte and *in-vitro*-  
198 derived early embryo measured at different temperatures. Raman spectra of all cells types contain a  
199 similar set of Raman bands. Lipid contribution is manifested by lines of CC stretching vibrations at  
200 1062, ~1100, 1130  $\text{cm}^{-1}$ , twisting (1300  $\text{cm}^{-1}$ ) and scissoring (1440  $\text{cm}^{-1}$ ) deformational CH modes,  
201 double bonded C=C (1660  $\text{cm}^{-1}$ ) and C=O (1745  $\text{cm}^{-1}$ ) bands. Raman peaks at 2850 and 2882  $\text{cm}^{-1}$   
202 manifest the symmetric  $\text{CH}_2$  (sCH) and antisymmetric  $\text{CH}_2$  (aCH) stretching vibrations, respectively.

203 The absence of CN stretching mode at  $700\text{ cm}^{-1}$ , which is typical for phospholipids (51), indicates that  
204 lipid contribution comes mainly from triglycerides and free fatty acids.

205 In addition to intensive lipid contribution, Raman spectra also contain the lines indicating the  
206 presence of proteins and glycerol. The low-intensity line at  $1004\text{ cm}^{-1}$  is assigned to phenylalanine  
207 contribution, also peaks at  $603$ ,  $750$  and  $1586\text{ cm}^{-1}$  correspond to resonance Raman scattering of  
208 cytochromes. Other well-known protein lines such as cytochrome peak at  $1130\text{ cm}^{-1}$  or Amide I mode  
209 at  $\sim 1655\text{ cm}^{-1}$  overlap with lipid lines. The existence of cytochrome Raman lines points on an external  
210 contribution from the cytoplasm and the nearest organelles. The protein contribution can be neglected  
211 since the intensity of the most intensive protein related peaks ( $750$ ,  $1004$ ,  $1586\text{ cm}^{-1}$ ) in the collected  
212 Raman spectra did not exceed 10 % from the deformational band at  $1440\text{ cm}^{-1}$  and C=C mode of  
213 lipids. Glycerol contribution from LD surroundings has to be taken into account in Raman spectra due  
214 to concentration changes resulting from ice formation and cell dehydration. We used glycerol peaks at  
215  $420$  and  $483\text{ cm}^{-1}$  to evaluate the intensity of glycerol peaks (52) and subtract the Raman spectra of  
216 aqueous glycerol solution from the raw spectra measured from the cells. Glycerol spectrum is  
217 temperature dependent (46) thereby Raman spectra from the cell and glycerol solution measured at  
218 same temperatures were applied in subtraction procedure (see details in Supplementary Material).

219 We used Raman spectra to estimate the degree of lipid unsaturation and to investigate the LPT.  
220 To evaluate the degree of unsaturation, Raman intensities of CH deformation mode ( $\text{CH}_2$  scissoring  
221 and  $\text{CH}_3$  antisymmetric bending vibrations) and C=C peak were studied. Lipid lines demonstrate  
222 pronounced temperature dependence (see Fig. 1). The C=O, CC and CH stretching vibrations are  
223 sensitive to the LPT, however, these bands reflect different aspects of lipid structure. The quality of the  
224 measured spectra is sufficient for comprehensive analysis of the LPT using all these three spectral  
225 regions.

## 226 Analysis of lipid unsaturation degree

227 The degree of lipid unsaturation is known to affect the temperature of the main LPT.  
228 Unsaturation degree can be characterized by the ratio between number of C=C bonds and number of  
229  $\text{CH}_2+\text{CH}_3$  groups ( $N_{\text{C=C}}/N_{\text{CH}_2+\text{CH}_3}$ ). The intensity ratio between C=C peak ( $I_{\text{C=C}}$ ) and deformational  
230 mode at  $1440\text{ cm}^{-1}$  ( $I_{\delta\text{CH}}$ ) can be used to estimate the degree of lipid unsaturation (53,54). To do so, we  
231 constructed a calibration curve (Fig. 2 a) based on several measured triglycerides, phospholipids and  
232 free fatty acids with different amount of double bonds per acyl chain (see Fig. 2 b). The  $N_{\text{C=C}}/N_{\text{CH}_2+\text{CH}_3}$   
233 was calculated taking into account C=C,  $\text{CH}_2$ ,  $\text{CH}_3$  groups from acyl chains only. All spectra were  
234 measured from samples in disordered phase state at room temperature ( $+25\text{ }^\circ\text{C}$ ), which is important  
235 because  $I_{\text{C=C}}/I_{\delta\text{CH}}$  intensity ratio depends on temperature and phase state (for example, see temperature  
236 evolution of Raman spectra in Fig. 1). The obtained calibration curve is shown in Fig. 2 b.



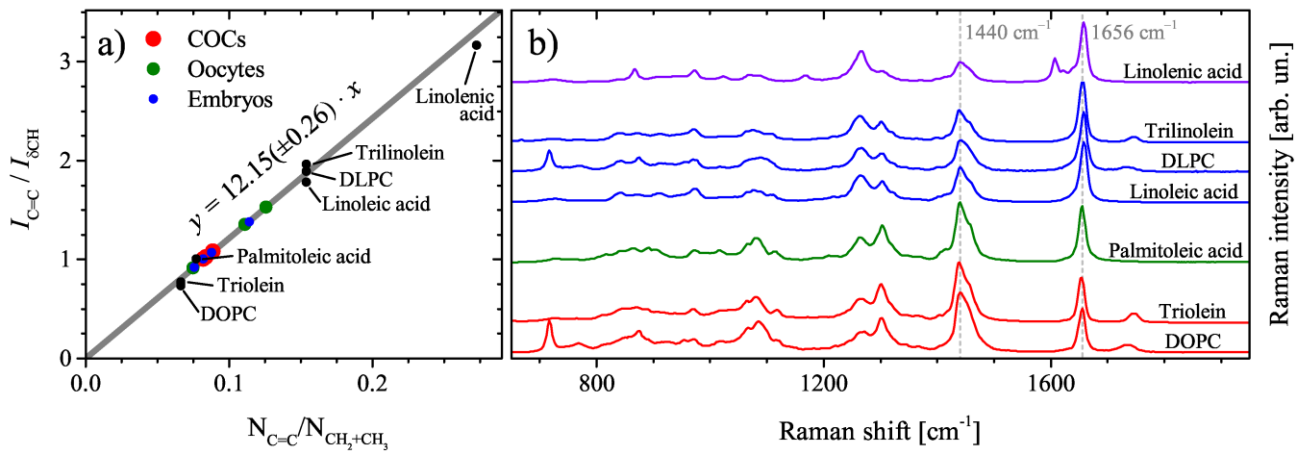

237  
 238 FIGURE 2 (a) Calibration curve for the evaluation of the degree of unsaturation  
 239 ( $N_{C=C}/N_{CH_2+CH_3}$ ) from intensity ratio Raman data  $I_{C=C}/I_{\delta_{CH}}$ . Gray line is a linear fit  
 240 ( $R^2=0.99$ ). (b) Raman spectra from unsaturated lipids used to calibrate the  
 241 unsaturation degree in LDs. Spectra are shifted vertically for illustrative purposes.

242 To estimate the degree of unsaturation, we used spectra of LDs measured at +20 °C. Averaged  
 243 over all the cells studied  $I_{C=C}/I_{\delta_{CH}}$  is about 1.125 with a standard deviation of 20%. This ratio  
 244 corresponds to  $N_{C=C}/N_{CH_2+CH_3}=0.0925$  or, putting it in other words, ~1.3 double bonds per typical C18  
 245 acyl chain in average. Our experiments do not reveal a significant difference in the degree of lipid  
 246 unsaturation for different cell types (for details see Table 1). However, the valuable deviation between  
 247 different experiments were found. The spread in  $I_{C=C}/I_{\delta_{CH}}$  can be partly associated with the systematic  
 248 experimental errors, i.e. variations in polarization conditions of Raman experiment or protein  
 249 contribution to measured Raman spectra. Also,  $N_{C=C}/N_{CH_2+CH_3}$  spread may come from unspecified  
 250 parameters such as cat breed or cat diet.

251

**TABLE 1 Summary of Raman study results.**

| #       | $I_{C=C}/I_{\delta_{CH}}$ | $N_{C=C}/N_{CH_2+CH_3}$ | $T^*$ , °C | $T_C$ , °C | $\beta$ phases fraction |
|---------|---------------------------|-------------------------|------------|------------|-------------------------|
| COC #1  | 1.08                      | 0.089                   | -4         | -29 ÷ -24  | 65±5%                   |
| COC #2  | 1.02                      | 0.084                   | -2         | -7 ÷ -4    |                         |
| COC #3  | 1                         | 0.082                   | +1         | -20 ÷ -13  |                         |
| Ooc. #1 | 1.53                      | 0.126                   | -2         | -30 ÷ -25  | 52±5%                   |
| Ooc. #2 | 0.91                      | 0.075                   | -2         | -29 ÷ -8   |                         |
| Ooc. #3 | 1.35                      | 0.111                   | -1         | -62 ÷ -8   |                         |
| Emb. #1 | 0.92                      | 0.076                   | -2         | -33 ÷ -10  | 47±5%                   |
| Emb. #2 | 1.38                      | 0.114                   | +4         | -34 ÷ -14  |                         |
| Emb. #3 | 1.07                      | 0.088                   | -10        | -20 ÷ -10  |                         |
| Emb. #4 | 1                         | 0.082                   | -5         | -51 ÷ -30  |                         |

252

## 253 The CH stretching band

254 Fig. 3 shows the temperature evolution of the CH band which is sensitive to acyl chain  
255 conformations and intermolecular interactions. The most striking effect associated with the changes in  
256 the lipid molecules state caused by temperature decrease is the intensity increase of aCH mode at 2882  
257  $\text{cm}^{-1}$ . To investigate the changes in the intensity of aCH we studied intensity ratio between aCH and  
258 sCH modes ( $I_{\text{aCH}}/I_{\text{sCH}}$ ). At high temperatures ( $T > 0^\circ\text{C}$ ), the aCH peak is broadened and  $I_{\text{aCH}}/I_{\text{sCH}}$  ratio  
259 is low indicating on inhomogeneous broadening and high variance of conformational states of lipid  
260 molecules in disordered phase state. A decrease in temperature leads to a narrowing of the aCH peak,  
261 which is associated with freezing of the lipid conformational states and an increase in the ratio  
262  $I_{\text{aCH}}/I_{\text{sCH}}$ . The abrupt increase of  $I_{\text{aCH}}/I_{\text{sCH}}$  ratio with temperature decrease can be considered as an  
263 evidence of the LPT occurrence.

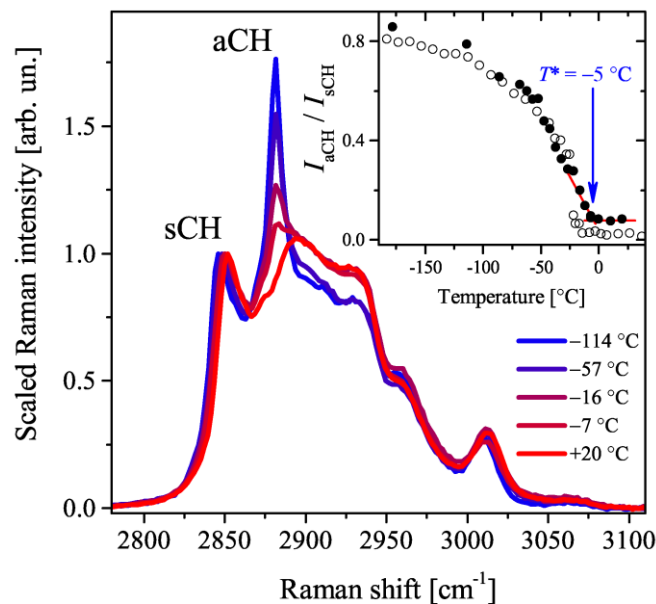

264  
265 FIGURE 3 Temperature evolution of Raman CH band from a LD *in vivo* (embryo #4  
266 in Table 1). The inset shows the temperature dependence of  $I_{\text{aCH}}/I_{\text{sCH}}$  ratio for the LD  
267 (filled circles) and DOPC vesicles data (empty circles) taken from (48). Arrow marks  
268 the temperature corresponding to the onset of the LPT in LDs.

269 The inset in Fig. 3 shows the  $I_{\text{aCH}}/I_{\text{sCH}}$  ratio temperature dependences of synthetic DOPC vesicles  
270 and LD inside the preimplantation cat embryo. DOPC has a one double bond per C18 acyl chain,  
271 which is comparable to the degree of lipid unsaturation in LDs in cat oocytes and embryos. Above  $0^\circ\text{C}$   
272 the  $I_{\text{aCH}}/I_{\text{sCH}}$  ratio for both samples can be described with a temperature independent constant. The  
273  $I_{\text{aCH}}/I_{\text{sCH}}$  ratio temperature dependence of synthetic DOPC has a sharp gap corresponding to the LPT at  
274  $-17^\circ\text{C}$ . Triolein, which contains three C18 acyl chains with one double bond per each, also exhibits an  
275 abrupt change in  $I_{\text{aCH}}/I_{\text{sCH}}$  at the LPT temperature (for example, see temperature dependence for  
276 triolein in Fig. S7). However, in the case of LDs in freezing embryos and oocytes, the LPT is  
277 broadened, and the increase in  $I_{\text{aCH}}/I_{\text{sCH}}$  occurs more gradually without abrupt changes in  $I_{\text{aCH}}/I_{\text{sCH}}$

278 ratio. In this case, the  $I_{aCH}/I_{sCH}$  ratio deviation from high temperature constant can be considered as the  
279 onset of the LPT related to inactivation of conformations state of acyl chains. The onset of the LPT can  
280 also be detected by the peculiarity in the temperature behaviour of the symmetric  $CH_2$  mode (Fig. S4,  
281 S5, S6). However, the  $I_{aCH}/I_{sCH}$  appears to be a more reliable parameter.

282 The temperature of the LPT onset ( $T^*$ ) demarcates the completely disordered liquid state and  
283 intermediate states with a higher degree of ordering (inset of Fig. 3). For all cells studied the  $I_{aCH}/I_{sCH}$   
284 ratio increase begins in temperature range from  $-10$  to  $+4$  °C, with average value of  $-2$  °C. Estimated  
285  $T^*$  does not correlate with cell type or degree of lipid unsaturation (for details see Table 1). However,  
286 maximal spread in  $T^*$  was found for early embryo stage. At low temperature limit,  $I_{aCH}/I_{sCH}$   
287 temperature dependences of LDs are similar to synthetic phospholipid samples (48), following the  
288 earlier reported study (46).

### 289 **The C=O stretching band**

290 In the Raman spectra, ester carbonyl stretching region can provide the insight into the lipid phase  
291 organization (27,28). Triglycerides have three polymorphic forms in solid-like ordered phase:  $\alpha$ ,  $\beta'$ ,  
292 and  $\beta$  (55). Raman C=O band can be used to distinguish liquid-like disordered state and three  
293 polymorphic forms of the ordered phase (56). The C=O band corresponding to liquid state does not  
294 demonstrate any pronounced spectral features and can be described using a Gaussian shape centered at  
295 about  $1750\text{ cm}^{-1}$ . In Raman spectra from polymorphic  $\alpha$  form, the C=O band also has Gaussian-like  
296 shape, but the band position is shifted to lower frequencies when compared to the spectrum of the  
297 liquid state. Other polymorphic forms demonstrate more complex shapes of the C=O band. For  
298 example, the  $\beta$  phase of triolein demonstrates in Raman spectra two sharp peaks at  $1727$  and  $1744\text{ cm}^{-1}$ ,  
299 spectra of  $\beta'$  phase of triolein have the peaks at  $1730$  and  $1741\text{ cm}^{-1}$  (56). Raman spectra obtained in  
300 our experiments have three broad peaks at about  $1727.5$ ,  $1734$  and  $1741\text{ cm}^{-1}$ . Full set of these lines  
301 does not match to any known lipid polymorphic forms. Taking into account that Raman spectra of  
302 different phases depend on particular triglyceride studied, identification of particular  $\beta$  and  $\beta'$  phases  
303 only by Raman spectra seems to be an incorrect task for such complex object as a natural LD. Frozen  
304 LD can be formed by a mixture of  $\beta$  and  $\beta'$  phases of different triglycerides. Therefore, for simplicity,  
305 further in the text we will use a term “ $\beta$  phases” implying  $\beta$ ,  $\beta'$  or a mixture of these two phases.

306 To reveal the lipid crystallization (transition from liquid to solid state, related to ordering in  
307 molecules arrangement), we followed the position of the C=O band which was evaluated from C=O  
308 band fit with Gaussian. Obtained from different experiments temperature dependences of the C=O  
309 band position are shown in Fig 4. It can be seen that the temperature dependences from LDs in COCs  
310 have a discontinuity, which the temperature dependences from mature oocytes and early embryos do  
311 not have. The detected gap was associated with the transition to solid ordered states, i.e. crystallization

312 of lipids. This gap was used to determine the lipid crystallization temperature ( $T_C$ ). For three COCs  
 313 measured  $T_C \approx -5, -17, -27$  °C i.e. varies significantly from cell to cell. The temperature dependences  
 314 of mature oocytes and embryos demonstrate the broadened lipid crystallization occurring in the  
 315 temperature range from  $-10$  to  $-50$  °C. Temperature ranges of phase transformation for oocytes and  
 316 embryos are shown in Table 1. In some cases, temperature dependences demonstrate both gradual  
 317 change and a short gap in C=O band position (Ooc. #1 and Emb. #4 in Fig. 4 and Table 1).

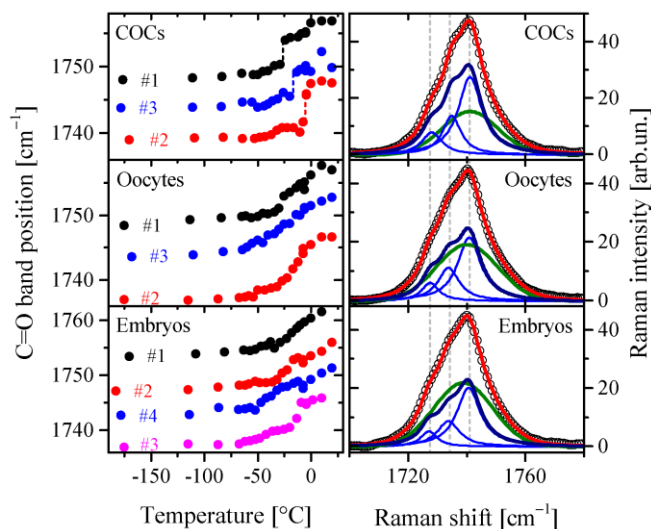

318  
 319 FIGURE 4 Temperature dependences of C=O band position and band decomposition  
 320 (at  $T < -60$  °C). The left panel shows the temperature dependences of C=O band  
 321 position for different cell types. Presented temperature dependences are shifted  
 322 vertically by  $+5$   $\text{cm}^{-1}$  for illustrative purposes. Vertical dashed lines in the subpanel  
 323 with COCs data mark the gaps corresponding to polymorphic transitions. The right  
 324 panel shows decomposition of experimental C=O spectra on three Lorentzians and one  
 325 Gaussian peak described in the text. Empty circles denote experimental data, the red  
 326 lines denote the applied fits, the green lines show Gaussian contribution and the navy  
 327 lines show the contribution from a sum of Lorentz peaks. Vertical dashed lines mark  
 328 the averaged positions of Lorentz peaks shown by blue lines.

329 In order to study the phase content of frozen LDs, the spectral shape of the C=O band was  
 330 investigated. We used spectra with high signal to noise ratio obtained from averaging of the spectra  
 331 from cells of the same type and all the temperatures below  $-60$  °C. Average spectra were fitted with a  
 332 sum of three Lorentz peaks and one Gaussian (see Fig. 4). Lorentz peaks simulate contribution from  $\beta$   
 333 phases and Gaussian models a contribution from less ordered  $\alpha$  phase. When fitting the peak non-  
 334 negativity constraints were used, the initial values of peaks positions were specified but not fixed. The  
 335 fit results demonstrated similar parameters of Lorentz peaks (see Fig. S9, S10 and Table S1 in  
 336 Supplementary Material). Therefore the Lorentz peaks (at  $1727.5, 1734, 1741$   $\text{cm}^{-1}$ ) do originate from  
 337 the same structure. The estimated ratio between two phases turned out to be somehow different for  
 338 COCs and other cells. In LDs of frozen COCs, the portion of  $\beta$  phases is about  $65\%$  ( $\pm 5\%$ ) from the  
 339 overall area of the C=O band. Raman spectra of mature oocytes and early embryos reveal about  $50\%$

340 ( $\pm 5\%$ ) concertation of  $\beta$  phases. Investigation of C=O band evidences that the freezing of LDs in  
341 COCs differs from the freezing of the LDs in mature oocytes and early embryos.

## 342 The C-C stretching region

343 CC stretching region is widely used in the investigations of acyl chain ordering in model lipid  
344 systems (29,48,51,57). Therefore, the capability to investigate CC region in Raman spectra from  
345 biological samples was examined. Fig. 5 a shows the temperature dependence of Raman spectra in CC  
346 stretching region after baseline and glycerol contributions subtractions. Temperature decrease leads to  
347 the intensity growth of the peaks at 1062,  $\sim 1100$ , 1130  $\text{cm}^{-1}$ . The mode at the highest frequency at  
348 about 1130  $\text{cm}^{-1}$ , also known as “all-trans” mode, is considered as a reliable measure of all-trans  
349 conformations (51). The intensity measurement for CC modes is problematic due to ambiguity in  
350 baseline correction and overlap with the cytochrome peak. Therefore, the temperature dependence of  
351 the all-trans peak position was examined (see Fig. 5 b). At temperatures above  $T^*$ , the precision of the  
352 parameters evaluation is low due to the low intensity of the all-trans peak. Below this temperature, the  
353 all-trans peak becomes sharper and increases the peak position. Further temperature decrease leads to  
354 the peak sharpening and the position shift towards to the higher frequencies. Obtained temperature  
355 dependence is in qualitative agreement with the data obtained from synthetic lipids such as DOPC  
356 (Fig. 5 b). However, low precision of the all-trans peak position estimation at high temperature makes  
357 it difficult to detect the LPT using this approach.

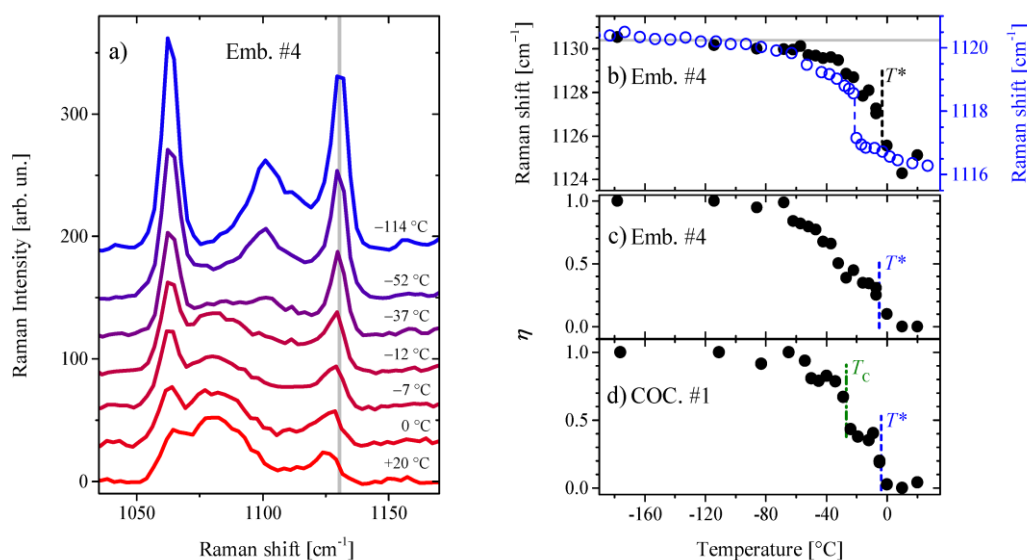

358  
359 FIGURE 5 Temperature evolution Raman spectrum in the CC stretching region.  
360 Panel a) shows representative stretch CC region of Raman spectra measured from  
361 LD *in vivo* (Emb. #4 in Table 1). Gray vertical line denotes the so-called “all-trans”  
362 peak. Spectra are shifted vertically for illustrative purposes. On the right, panel b)  
363 shows the temperature dependence of the all-trans peak position (Emb. #4). Filled  
364 circles represent data obtained from the LD; empty circles correspond to DOPC  
365 vesicles data taken from (48). Panels c), d) demonstrate temperature dependences of

366  $\eta$  in the case of Emb. #4 and COC #1, respectively. Vertical dash lines denote  $T^*$   
367 determined from CH stretching region analyses. Vertical dash-dotted line denotes  $T_C$   
368 evaluated from the C=O band analysis.

369 To study the temperature evolution of the CC stretching region and avoid the problems with all-trans  
370 peak analysis, we used a simplified approach based on the CC spectrum linear decomposition into  
371 spectral components. This concept is already successfully tested on synthetic lipids (58,59). In  
372 approximation that the acyl chains of lipid molecules are in ordered all-trans conformation state at the  
373 low-temperature limit (below  $-100$  °C) and the completely disordered at the high-temperature limit  
374 (above  $10$  °C), the CC region was described as the combination of spectral components corresponding  
375 to ordered,  $S_o(\omega)$ , and disordered,  $S_d(\omega)$ , states and linear background. Since this approach involves in  
376 the analysis not only all-trans mode, but also other CC modes, more reliable data can be extracted from  
377 Raman spectra. Therefore, the Raman spectrum in CC region,  $I(\omega)$ , was fitted with the linear  
378 combination

$$379 \quad I(\omega) = a + b \cdot \omega + C_o \cdot S_o(\omega) + C_d \cdot S_d(\omega), \quad (1)$$

380 where  $a$ ,  $b$  correspond to the parameters of the linear function,  $C_o$ ,  $C_d$  are the magnitudes of the  
381 ordered and disordered components, respectively. The details of data handling and examples of CC  
382 region fits are presented in Supplementary material (Fig. S3). Although the proposed description does  
383 not take into account the intermediate conformation states, this approach is sufficient to monitor the  
384 most pronounced changes in CC region.

385 The ratio  $\eta$ , defined as  $C_o/(C_o + C_d)$ , was used as the acyl chain ordering parameter. The  $\eta = 0$   
386 corresponds to acyl chains in completely disordered conformation state while in the case of the ordered  
387 state  $\eta = 1$ . The example of  $\eta(T)$  is shown in Fig. 5 c. The parameter  $\eta$  begins to increase at  
388 approximately the same temperatures as the  $I_{aCH}/I_{sCH}$  ratio. In the case of COC #1,  $\eta(T)$  demonstrate an  
389 abrupt increase at a temperature corresponding to the peculiarity observed in the C=O band (Fig. 4,  
390 5d). However, in the case of COC #3,  $\eta(T)$  does not show pronounced changes at  $T_C$ , which may result  
391 from the insufficient quality of measured Raman spectra. For COC #2,  $T^*$  and  $T_C$  are too close to  
392 distinguish these two peculiarities in  $\eta(T)$  (Fig. S4). Thus, we conclude that the CC region appears to  
393 be sensitive to the onset of the LPT related to the ordering of acyl chain conformational states and in  
394 some cases it seems to be possible to detect lipid ordering in the molecules arrangement.

## 395 DISCUSSION

396 Genome Resource Bank (GRB) concept was successfully applied to a number of laboratory and  
397 farm animal species (2-4). However, freezing of embryos and oocytes is still challenging for some  
398 more exotic mammalian species, especially for those, which oocytes/early embryos are rich with lipids

399 (5,11). Thus to achieve better survival rates and to avoid massive injuries, estimation of the lipid  
400 content, evaluation of LPT transition and its control by the conditions of freezing is needed (34-36,46).  
401 Here we presented the most accurate and detail data to date about LPT in Felidae oocytes and embryos  
402 using contactless Raman approach.

403 The average unsaturation degree was successfully estimated for the lipids in domestic cat COCs,  
404 mature oocytes and early embryos. LDs in domestic cat COCs, oocytes, and early embryos  
405 demonstrate a similar degree of unsaturation about 1.3 double bonds per C18 chain and 20 % deviation  
406 ( $N_{C=C}/N_{CH_2+CH_3}=0.0925$ ). In comparison, the average unsaturation degree for ovine oocytes, calculated  
407 from phospholipid chromatography data (36), is about three times lower ( $N_{C=C}/N_{CH_2+CH_3}=0.0313$ ). The  
408 high deviation may result from unspecified parameters since all the oocytes and embryos studied were  
409 taken from different cats: breed and diet were not specified. Taking into account the data deviations,  
410 we conclude that no drastic changes in the lipid unsaturation degree occur during domestic cat COCs  
411 development to mature oocytes and early embryos. At the same time, our results can not exclude the  
412 changes in the average unsaturation degree at the level of ~10 %.

413 Raman experiment detected the LPT in freezing COCs, mature oocytes and early embryos of a  
414 domestic cat. The study of temperature evolution of measured Raman spectra revealed two  
415 peculiarities in lipid state in freezing cells. The first one ( $T^*$ ) was observed in temperature  
416 dependences of Raman spectra in  $CH_2$ , CC stretch regions. Above  $T^* = -2$  ( $-10 \div +4$ ) °C, the LD is  
417 completely in the liquid disordered state, while below  $T^*$  the CC and CH bands evidence on the partial  
418 ordering of acyl chains. In earlier studies of LPT in oocytes (34-37) and embryos (46), only  $CH_2$   
419 stretching modes were investigated. Averaged  $T^*$  is in agreement with the recently reported Raman  
420 study of the LPT in mouse embryos, where the LPT was detected in the temperature range from  $-7$  to  
421  $0$  °C (46). However, for the other species, the LPT is reported at temperatures above  $0$  °C (34-37).  
422 Bovine oocytes undergo the LPT in the temperature range from  $+13$  to  $+20$  °C (35), and for ovine  
423 oocytes the broadened LPT occurs at  $+16$  °C (36). Following the conception that chilling injury  
424 depends on the LPT (34,36,60), the comparison of different species indicates that embryos and oocytes  
425 of domestic cat should have higher chilling tolerance as compared to the ovine or bovine ones.  
426 Possibly, this might be the reason that the embryos of the domestic cat were successfully  
427 cryopreserved in 1988 (61), much earlier than the embryos of any other Carnivora species. Since then,  
428 *in vivo* and *in vitro* produced embryos of the domestic cat were regularly frozen mostly by  
429 conventional freezing methods (13,62,63), although very few successful embryo cryopreservation  
430 reports were published for other Carnivora animal species (5).

431 In our interpretation, below  $T^*$  the lipids start to turn from the liquid disordered to the  
432 intermediate liquid ordered state. In some cases, mainly in oocytes and early embryos, further cooling  
433 is followed by the simultaneous gradual increase in acyl chains ordering and translational ordering in

434 the molecular arrangement. In the case of COCs demonstrating additional peculiarity in the behaviour  
435 of C=O mode, rapid ordering in lipid molecules arrangement (i.e. crystallization) occurs at  $T_C \approx -19$   
436 ( $-27 \div -5.5$ ) °C. Between  $T^*$  and  $T_C$ , LD seems to occur in the intermediate liquid-ordered state.  
437 Based on our data on Raman spectroscopy (Fig. S8), we hypothesize that lipids in this intermediate  
438 state are ordered in acyl chain conformational state and disordered in the translational arrangement of  
439 the molecules. It should be noted that in a homogeneous triglyceride system the ordering of  
440 hydrocarbon chains and molecular arrangement occur abruptly at the same temperature (see triolein  
441 example in Fig. S7).

442 Currently, three models describing the liquid-crystalline phase of triglycerides in the disordered  
443 state are proposed (27): smectic (64), nematic (65) and discotic (66,67). The last model assumes that in  
444 liquid state triglyceride molecules have splayed orientation of acyl chains, forming a discotic (Y-like)  
445 conformation state with disordered hydrocarbon chains. The first two models use the concept that lipid  
446 molecules in liquid state have a more specific orientation of acyl chains resembling a tuning-fork,  
447 which is also known as h-like conformation. Since h-like triglyceride conformation state appears in  
448 crystalline phase state, this conformation can be considered as more predisposed to hydrocarbon chains  
449 ordering. The smectic phase is supposed to be the most ordered of the three phases mentioned, in this  
450 phase the molecules form distinct lamellar structures with a liquid-like translational disorder inside the  
451 layers. Therefore, it can be proposed that below  $T^*$ , triglycerides undergo one of the hypothetical  
452 transitions: from discotic to nematic, from nematic to smectic (33) phases or even from discotic to  
453 smectic phase state. These transitions convert triglycerides into conformational states more suitable for  
454 the ordering of acyl chains. The translational ordering of triglycerides (i.e. crystallization) is depressed,  
455 since LD consists of multicomponent triglyceride mixture enriched with different admixtures, such as  
456 cholesterol. Only at  $T_C$  the phase separation and crystallization of the supercooled mixture takes place.

457 The detected change in the C=O band position corresponds to triglyceride crystallization.  
458 Investigation of the C=O band position indicates on the formation of a mixture of different  
459 polymorphic forms. In a frozen state, about 65 % of triglycerides in COCs turn in highly ordered  $\beta$   
460 phases versus 50 % for LDs of matured oocytes and embryos. COCs were taken directly from ovarian  
461 tissue, while mature oocytes and early embryos were obtained after *in vitro* procedures  
462 (IVM/IVF/IVC). Thus, we suggest that incubation might be the source of the differences between  
463 COCs and later stages. Mass-spectrometry study evidence that lipid content may differ in fresh and *in*  
464 *vitro* cultured oocytes and embryos (68,69). These observations are also in agreement with the  
465 different biological properties of *in vitro* and *in vivo* matured oocytes (70). Interesting to note that  
466 COCs and later stages of development demonstrate the similar degree of lipid unsaturation and  $T^*$ , but  
467 different  $T_C$  and crystallized states. Probably, this effect is associated with the changes in the  
468 composition of lipophilic admixtures such as cholesterol.



469 While Raman spectroscopy was already introduced for the investigation of the LPT in early  
470 embryos (46), the present study expands the use of this approach to reveal the details of the LPTs in  
471 single oocytes and embryos. Raman spectroscopy can be considered as a method of choice for the *in*  
472 *situ* LPT research comprising individual cell monitoring. The capability of individual cell monitoring  
473 is especially critical for rare and endangered species. Single cell investigation also can help to avoid  
474 the effect of the LPT blurring that inevitably happens in the case of simultaneous study of multiple  
475 cells, this is important in the case of sharp transitions (for example see COC data in Fig. 4). Raman  
476 experiment can be performed with a high spatial resolution corresponding to the resolution of a  
477 confocal microscope and does not suffer from water absorbance limitations. It is noteworthy that the  
478 same series of Raman spectra contain information about the degree of lipid unsaturation, the onset of  
479 the LPT and triglyceride crystallization in freezing cells. In perspective, contactless label-free Raman  
480 approach can be embedded into actual cryopreservation systems and protocols to monitor the phase  
481 state of freezing and frozen cells.

## 482 CONCLUSION

483 In this study, we investigated the phase transitions in the LDs within the frozen COCs, mature  
484 oocytes and early embryos of domestic cats using Raman spectroscopy. The specific results of the  
485 study are:

- 486 (i) The average degree of lipid unsaturation ( $N_{C=C}/N_{CH_2+CH_3}$ ) was estimated to be about 0.0925 (with  
487 20% deviations). No significant differences in lipid unsaturation are found between COCs,  
488 matured oocytes and preimplantation embryos.
- 489 (ii) Investigation of the temperature dependences of CC and CH<sub>2</sub> Raman scattering lines made it  
490 possible to detect the onset of the lipid phase transition, which occurs typically at  $-2$  °C. No  
491 significant differences are found between different sample types: COCs, mature oocytes and  
492 early embryos. Temperature behaviour of CH<sub>2</sub> modes in Raman spectra from LDs in all these  
493 samples appears to be close to known temperature dependences of CH<sub>2</sub> stretching modes in  
494 synthetic lipid systems. Above the phase transition onset temperature, lipids are in a liquid  
495 disordered state in which the LDs can participate in cellular metabolism.
- 496 (iii) The C=O band is used to reveal triglyceride crystallization in LDs of the cat's cells during  
497 freezing. It is shown that the crystallization of LDs occurs differently for different cell types.  
498 COCs undergo a sharp transition, which occurs within the temperature range from  $-27$  to  $-5$  °C.  
499 In the case of early embryos and mature oocytes, lipid crystallization occurs gradually during  
500 freezing. In our experiments, the composition of polymorphic forms of triglycerides in frozen  
501 LDs differs for complexes of COCs and other stages of development.

502 Finally, we demonstrated that single cell Raman spectroscopy can provide *in situ* label-free  
503 characterization of lipid phase transitions in freezing oocytes and embryos. The proposed approach  
504 opens the prospects for monitoring of the lipid phase transitions in various lipid-rich embryos and  
505 oocytes.

## 506 SUPPORTING MATERIAL

507 Supporting Material including ten figures and one table is available at <http://...>

## 508 AUTHOR CONTRIBUTIONS

509 N.V.S., S.Y.A. and K.A.O designed research; K.A.O and V.I.M. performed the experiments;  
510 K.A.O. processed raw data; K.A.O. and N.V.S. analyzed data; K.A.O. wrote the manuscript with  
511 contributions from all coauthors.

## 512 ACKNOWLEDGMENTS

513 We thank V.V. Kozhevnikova for her participation in providing the domestic cat ovaries used in  
514 this study and helping.

515 This work was supported by RFBR (Grant No. 16-04-01221). Part of the experiments was  
516 performed in the Multiple-access center “High resolution spectroscopy of gases and condensed  
517 matters” in IA&E SBRAS (Novosibirsk, Russia). Biological part of the experiments was performed in  
518 the Federal Research Center “Institute of Cytology and Genetics” SB RAS (Novosibirsk, Russia).

## 519 REFERENCES

- 520 1. Mazur, P., S. P. Leibo, and Seidel Jr, G. E. 2008. Cryopreservation of the germplasm of animals  
521 used in biological and medical research: importance, impact, status, and future directions. *Biol.*  
522 *Reprod.* 78:2-12.
- 523 2. Amstislavsky, S. Y., E. Y. Brusentsev, ..., I. N. Rozhkova, 2015. Embryo and gamete  
524 cryopreservation for genetic resources conservation of laboratory animals. *Russ. J. Dev. Biol.*  
525 46:47-59.
- 526 3. Massip, A. 2001. Cryopreservation of embryos of farm animals. *Reprod. Domest. Anim.* 36:49-  
527 55.
- 528 4. Mara, L., S. Casu, ..., M. Dattena. 2013. Cryobanking of farm animal gametes and embryos as a  
529 means of conserving livestock genetics. *Anim. Reprod. Sci.* 138:25-38.
- 530 5. Amstislavsky, S., H. Lindeberg, and G. C. Luvoni. 2012. Reproductive technologies relevant to  
531 the genome resource bank in Carnivora. *Reprod. Domest. Anim.* 47:164-175.
- 532 6. Comizzoli, P., and D. E. Wildt. 2012. On the horizon for fertility preservation in domestic and  
533 wild carnivores. *Reprod. Domest. Anim.* 47:261-265.
- 534 7. Jewgenow, K., B. C. Braun, ..., F. Goeritz. 2017. Research on reproduction is essential for  
535 captive breeding of endangered carnivore species. *Reprod. Domest. Anim.* 52:18-23.

- 536 8. Fickel, J., A. Wagener, and A. Ludwig. 2007. Semen cryopreservation and the conservation of  
537 endangered species. *Eur. J. Wildlife Res.* 53:81-89.
- 538 9. Saragusty, J., and A. Arav. 2011. Current progress in oocyte and embryo cryopreservation by  
539 slow freezing and vitrification. *Reproduction.* 141:1-19.
- 540 10. Andrabi, S. M. H., and W. M. C. Maxwell. 2007. A review on reproductive biotechnologies for  
541 conservation of endangered mammalian species. *Anim. Reprod. Sci.* 99:223-243.
- 542 11. Pereira, R. M., and C. C. Marques. 2008. Animal oocyte and embryo cryopreservation. *Cell*  
543 *Tissue Bank.* 9:267-277.
- 544 12. Apparicio, M., C. R. Ferreira, ... F. C. Gozzo. 2012. Chemical Composition of Lipids Present in  
545 Cat and Dog Oocyte by Matrix-Assisted Desorption Ionization Mass Spectrometry  
546 (MALDI-MS). *Reprod. Domest. Anim.* 47:113-117.
- 547 13. Pope, C. E. 2014. Aspects of in vivo oocyte production, blastocyst development, and embryo  
548 transfer in the cat. *Theriogenology.* 81:126-137.
- 549 14. Jewgenow, K., and M. C. Paris. 2006. Preservation of female germ cells from ovaries of cat  
550 species. *Theriogenology.* 66:93-100.
- 551 15. Nagashima, H., N. Kashiwazaki, ..., M. B. Nottle. 1995. Cryopreservation of porcine embryos.  
552 *Nature.* 374:416.
- 553 16. Galiguis, J., M. C. Gómez, ..., C. E. Pope. 2014. Birth of a domestic cat kitten produced by  
554 vitrification of lipid polarized in vitro matured oocytes. *Cryobiology.* 68:459-466.
- 555 17. Romão, R., C. C. Marques, ..., R. M. Pereira. 2015. Cryopreservation of in vitro-produced sheep  
556 embryos: Effects of different protocols of lipid reduction. *Theriogenology.* 84:118-126.
- 557 18. Matos, J. E., C. C. Marques, ..., R. M. Pereira. 2015. Conjugated linoleic acid improves oocyte  
558 cryosurvival through modulation of the cryoprotectants influx rate. *Reprod. Biol. Endocrin.*  
559 13:60.
- 560 19. Nagashima, H., N. Kashiwazaki, ..., M. B. Nottle. 1994. Recent advances in cryopreservation of  
561 porcine embryos. *Theriogenology.* 41:113-118.
- 562 20. Yoneda, A., K. Suzuki, ..., T. Watanabe. 2004. Effects of delipidation and oxygen concentration  
563 on in vitro development of porcine embryos. *J. Reprod. Develop.* 50:287-295.
- 564 21. Van Meer, G., D. R. Voelker, and G. W. Feigenson. 2008. Membrane lipids: where they are and  
565 how they behave. *Nat. Rev. Mol. Cell Biol.* 9:112-124.
- 566 22. Filippov, A., G. Orädd, and G. Lindblom. 2004. Lipid lateral diffusion in ordered and disordered  
567 phases in raft mixtures. *Biophys. J.* 86:891-896.
- 568 23. Papahadjopoulos, D., K. Jacobson, ..., T. Isac. 1973. Fluorescence polarization and permeability  
569 measurements concerning the effect of temperature and cholesterol. *Biochim. Biophys. Acta,*  
570 311:330-348.
- 571 24. Elamrani, K., and A. Blume. 1983. Effect of the lipid phase transition on the kinetics of  $H^+/OH^-$   
572 diffusion across phosphatidic acid bilayers. *BBA-Biomembranes.* 727:22-30.
- 573 25. Nagle, J. F. 1980. Theory of the main lipid bilayer phase transition. *Annu. Rev. Phys. Chem.*  
574 31:157-196.
- 575 26. Sato, K. 2001. Crystallization behaviour of fats and lipids—a review. *Chem. Eng. Sci.* 56:2255-  
576 2265.
- 577 27. Da Silva, E., and D. Rousseau. 2008. Molecular order and thermodynamics of the solid-liquid  
578 transition in triglycerides via Raman spectroscopy. *Phys. Chem. Chem. Phys.* 10:4606-4613.

- 579 28. Da Silva, E., and D. Rousseau. 2010. Raman Spectroscopy for the Study of Molecular Order,  
580 Thermodynamics, and Solid–Liquid Transitions in Triacylglycerols. *In Handbook of Vibrational*  
581 *Spectroscopy*. John Wiley & Sons. DOI: 10.1002/0470027320.s8947
- 582 29. Pink, D. A., T. J. Green, and D. Chapman. 1980. Raman scattering in bilayers of saturated  
583 phosphatidylcholines. Experiment and theory. *Biochemistry*. 19:349-356.
- 584 30. Quinn, P. J., and C. Wolf. 2009. The liquid-ordered phase in membranes. *BBA-Biomembranes*.  
585 1788:33-46.
- 586 31. Phillips, M. C., R. M. Williams, and D. Chapman. 1969. On the nature of hydrocarbon chain  
587 motions in lipid liquid crystals. *Chem. Phys. Lipids*. 3:234-244.
- 588 32. Rappolt, M., M. Vidal, M., ..., P. Laggner. 2003. Structural, dynamic and mechanical properties  
589 of POPC at low cholesterol concentration studied in pressure/temperature space. *Eur. Biophys. J.*  
590 31:575-585.
- 591 33. Sato, K. 1999. Solidification and phase transformation behaviour of food fats—a review. *Eur. J.*  
592 *Lipid Sci. Tech.* 101:467-474.
- 593 34. Arav, A., Y. Zeron, ..., J. H. Crowe. 1996. Phase transition temperature and chilling sensitivity  
594 of bovine oocytes. *Cryobiology*. 33:589-599.
- 595 35. Zeron, Y., A. Ocheretny, ..., A. Arav. 2001. Seasonal changes in bovine fertility: relation to  
596 developmental competence of oocytes, membrane properties and fatty acid composition of  
597 follicles. *Reproduction*. 121:447-454.
- 598 36. Zeron, Y., D. Sklan, and A. Arav. 2002. Effect of polyunsaturated fatty acid supplementation on  
599 biophysical parameters and chilling sensitivity of ewe oocytes. *Mol. Reprod. Dev.* 61:271-278.
- 600 37. Ghetler, Y., S. Yavin, ..., A. Arav. 2005. The effect of chilling on membrane lipid phase  
601 transition in human oocytes and zygotes. *Hum. Reprod.* 20:3385-3389.
- 602 38. Welte, M. A., and A. P. Gould. 2017. Lipid droplet functions beyond energy storage. *BBA-Mol.*  
603 *Cell Biol. L.* 1862:1260-1272.
- 604 39. Quinn, P. J. 1985. A lipid-phase separation model of low-temperature damage to biological  
605 membranes. *Cryobiology*. 22:128-146.
- 606 40. Isachenko, V., E. Isachenko, ..., F. Nawroth. 2001. Lipolysis and Ultrastructural Changes of  
607 Intracellular Lipid Vesicles after Cooling of Bovine and Porcine GV-oocytes. *Anat. Histol.*  
608 *Embryol.* 30:333-338.
- 609 41. Dong, J., J. Malsam, ..., A. Aksan. 2010. Spatial distribution of the state of water in frozen  
610 mammalian cells. *Biophys. J.* 99:2453-2459.
- 611 42. Okotrub, K. A., and N. V. Surovtsev. 2013. Raman scattering evidence of hydrohalite formation  
612 on frozen yeast cells. *Cryobiology*. 66:47-51.
- 613 43. Kreiner-Møller, A., F. Stracke, and H. Zimmermann. 2014. Hydrohalite spatial distribution in  
614 frozen cell cultures measured using confocal Raman microscopy. *Cryobiology*. 69:41-47.
- 615 44. Karpegina, Y. A., K. A. Okotrub, ..., N. V. Surovtsev. 2016. Cryoprotectant redistribution along  
616 the frozen straw probed by Raman spectroscopy. *Cryobiology*. 72:148-153.
- 617 45. Okotrub, K. A., and N. V. Surovtsev. 2015. Redox State of Cytochromes in Frozen Yeast Cells  
618 Probed by Resonance Raman Spectroscopy. *Biophys. J.* 109:2227-2234.
- 619 46. Okotrub, K. A., S. Y. Amstislavsky, and N. V. Surovtsev. 2017. Raman spectroscopy reveals the  
620 lipid phase transition in preimplantation mouse embryos during freezing. *Arch. Biochem.*  
621 *Biophys.* 635:37-43.

- 622 47. Surovtsev, N. V., E. S. Salnikov, ..., S. A. Dzuba. 2008. On the low-temperature onset of  
623 molecular flexibility in lipid bilayers seen by Raman scattering. *J. Phys. Chem. B.* 112:12361-  
624 12365.
- 625 48. Dmitriev, A. A., and N. V. Surovtsev. 2015. Temperature-Dependent Hydrocarbon Chain  
626 Disorder in Phosphatidylcholine Bilayers Studied by Raman Spectroscopy. *J. Phys. Chem. B.*  
627 119:15613-15622.
- 628 49. Willadsen, S. M. 1977. Factors affecting the survival of sheep embryos during deep-freezing and  
629 thawing. In *Ciba Foundation Symposium 52 - The freezing of mammalian embryos*. K. Elliot, J.  
630 Whelan editors. John Wiley & Sons, Chichester, pp. 175-201.
- 631 50. Leibo, S. P., and N. Songsasen. 2002. Cryopreservation of gametes and embryos of non-  
632 domestic species. *Theriogenology.* 57:303-326.
- 633 51. Surovtsev, N. V., N. V. Ivanisenko, ..., S. A. Dzuba. 2012. Low-temperature dynamical and  
634 structural properties of saturated and monounsaturated phospholipid bilayers revealed by Raman  
635 and spin-label EPR spectroscopy. *J. Phys. Chem. B.* 116:8139-8144.
- 636 52. Mendelovici, E., R. L. Frost, and T. Kloprogge. 2000. Cryogenic Raman spectroscopy of  
637 glycerol. *J. Raman Spectrosc.* 31:1121-1126.
- 638 53. Wu, H., J. V. Volponi, ..., S. Singh. 2011. In vivo lipidomics using single-cell Raman  
639 spectroscopy. *Proc. Natl. Acad. Sci. USA.* 108:3809-3814.
- 640 54. Hosokawa, M., M. Ando, ..., T. Tanaka. 2014. In vivo live cell imaging for the quantitative  
641 monitoring of lipids by using Raman microspectroscopy. *Anal. Chem.* 86:8224-8230.
- 642 55. Hernqvist, L. 1990. Polymorphism of triglycerides a crystallographic review. *Food Struct.* 9:39-  
643 44.
- 644 56. Akita, C., T. Kawaguchi, and F. Kaneko. 2006. Structural study on polymorphism of cis-  
645 unsaturated triacylglycerol: triolein. *J. Phys. Chem. B.* 110:4346-4353.
- 646 57. Gaber, B. P., and W. L. Peticolas. 1977. On the quantitative interpretation of biomembrane  
647 structure by Raman spectroscopy. *BBA-Biomembranes.* 465:260-274.
- 648 58. Fox, C. B., R. H. Uibel, and J. M. Harris. 2007. Detecting phase transitions in  
649 phosphatidylcholine vesicles by Raman microscopy and self-modeling curve resolution. *J. Phys.*  
650 *Chem. B.* 111:11428-11436.
- 651 59. Kitt, J. P., D. A. Bryce, and J. M. Harris. 2016. Calorimetry-Derived Composition Vectors to  
652 Resolve Component Raman Spectra in Phospholipid Phase Transitions. *Appl. Spectrosc.*  
653 70:1165-1175.
- 654 60. Drobnis, E. Z., L. M. Crowe, ..., J. H. Crowe. 1993. Cold shock damage is due to lipid phase  
655 transitions in cell membranes: a demonstration using sperm as a model. *J. Exp. Zool. Part A.*  
656 265:432-437.
- 657 61. Dresser, B. L., E. J. Gelwicks, ..., G. L. Keller. 1988. First successful transfer of cryopreserved  
658 feline (*Felis catus*) embryos resulting in live offspring. *J. Exp. Zool. Part A.* 246:180-186.
- 659 62. Gómez, M. C., E. Pope, ..., B. L. Dresser. 2003. Development of in vitro matured, in vitro  
660 fertilized domestic cat embryos following cryopreservation, culture and transfer.  
661 *Theriogenology.* 60:239-251.
- 662 63. Pope, C. E., M. C. Gómez, ..., B. L. Dresser. 2012. Applying Embryo Cryopreservation  
663 Technologies to the Production of Domestic and Black-Footed Cats. *Reprod. Domest. Anim.*  
664 47:125-129.
- 665 64. Larsson, K. 1972. Molecular arrangement in glycerides. *Eur. J. Lipid Sci. Technol.* 74:136-142.

- 666 65. Cebula, D. J., D. J. McClements, ..., P. R. Smith. 1992. Neutron diffraction studies of liquid and  
667 crystalline trilaurin. *J. Am. Oil Chem. Soc.* 69:130-136.
- 668 66. Corkery, R. W., D. Rousseau, ..., C. B. Hanna. 2007. A case for discotic liquid crystals in  
669 molten triglycerides. *Langmuir*. 23:7241-7246.
- 670 67. Pink, D. A., C. B. Hanna, C. B., ..., D. Rousseau. 2010. Modeling the solid-liquid phase  
671 transition in saturated triglycerides. *J. Chem. Phys.* 132:02B601.
- 672 68. Leão, B. C., N. A. Rocha-Frigoni, ..., G. Z. Mingoti. 2015. Membrane lipid profile monitored by  
673 mass spectrometry detected differences between fresh and vitrified in vitro-produced bovine  
674 embryos. *Zygote*. 23:732-741.
- 675 69. Sprícigo, J. F., M. N. Diógenes, ..., M. A. Dode. 2015. Effects of different maturation systems  
676 on bovine oocyte quality, plasma membrane phospholipid composition and resistance to  
677 vitrification and warming. *PLoS One*. 10:e0130164.
- 678 70. Van Soom, A., A. E. Wrathall, ..., H. J. Nauwynck. 2009. Is the zona pellucida an efficient  
679 barrier to viral infection? *Reprod. Fert. Develop.* 22:21-31.

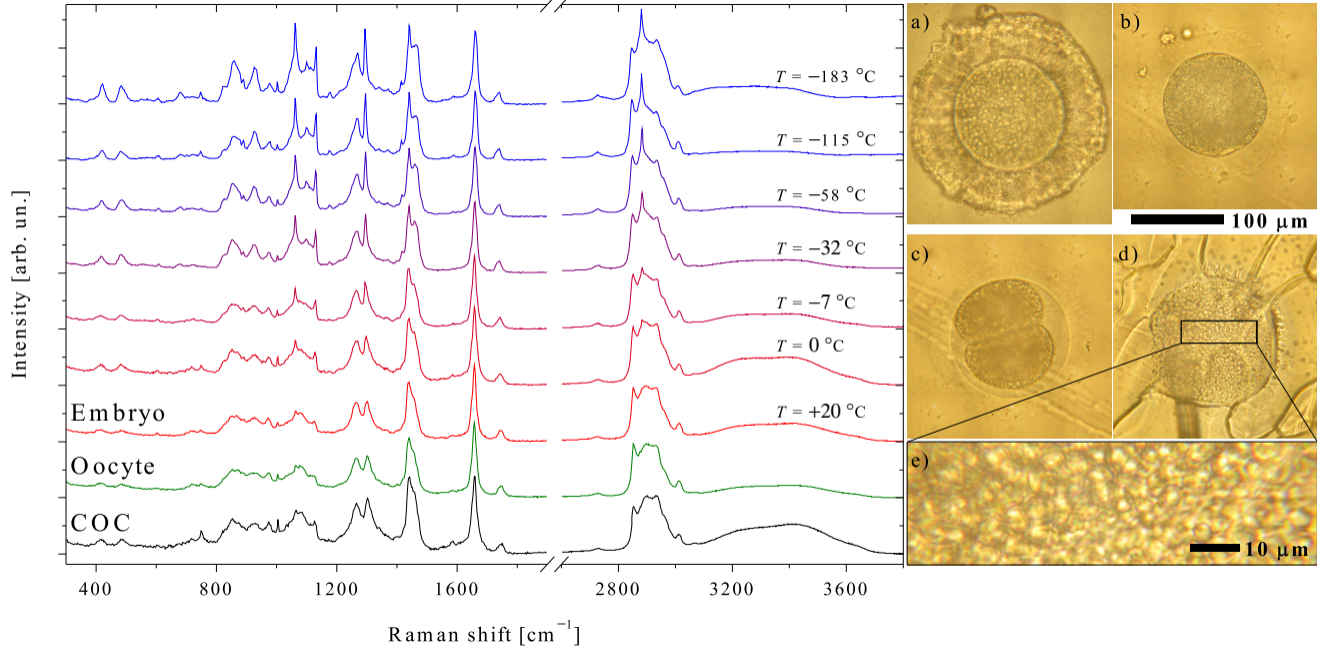

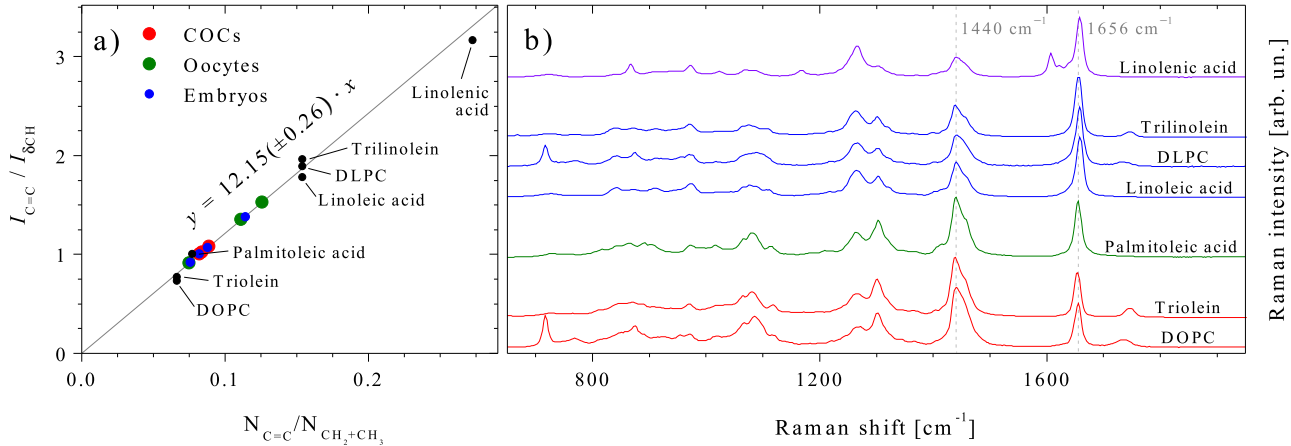



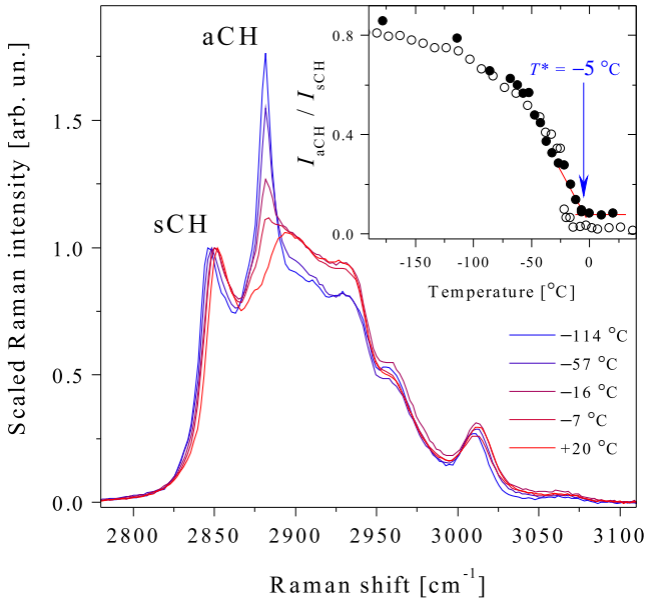

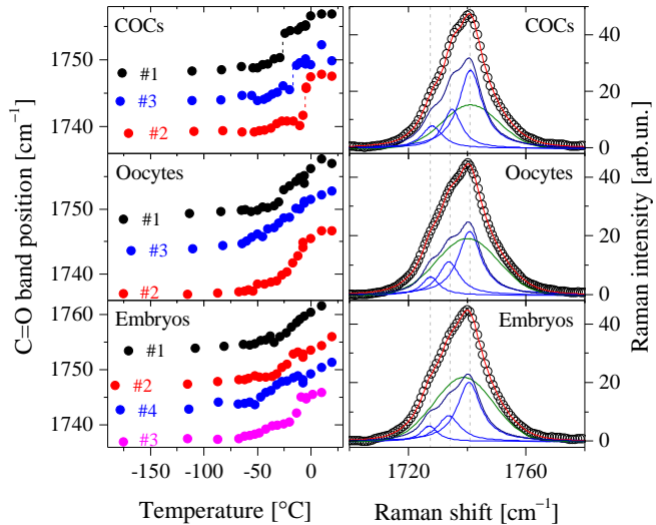

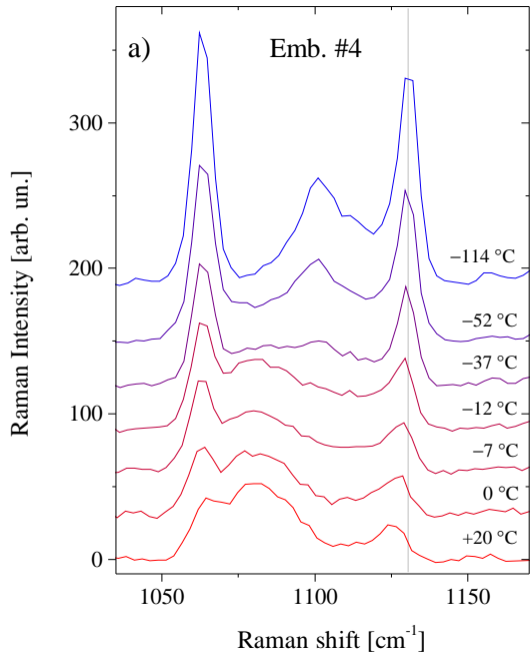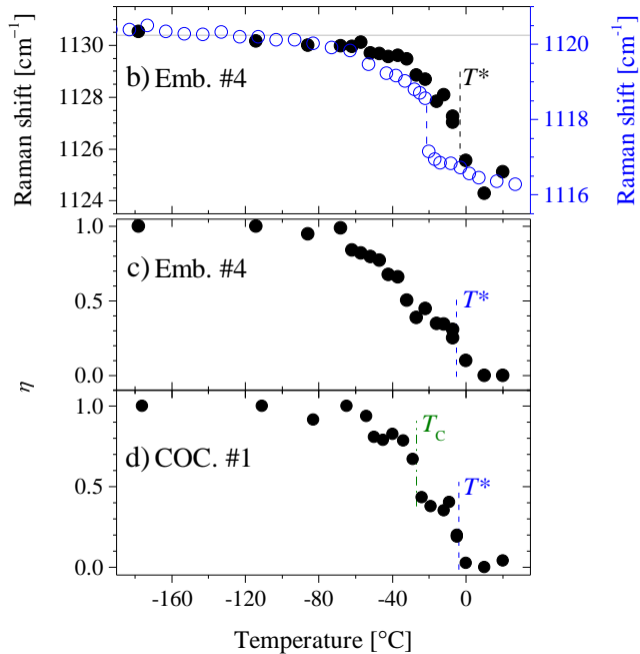

Source: https://www.biorxiv.org/content/10.1101/275164v1.full.pdf
